# Supplementary material for: A genome‐wide investigation of the worldwide invader Sargassum muticum shows high success albeit (almost) no genetic diversity
Source: PubMed Central journal article supplement (PMC7045713; doi:10.1111/eva.12837), 2019-08-14

## Supplementary Information

**Table S1. Sampling information for *Sargassum muticum* populations.** Populations code (see Figure 1 in the Main Manuscript for geographic location), collectors, sampling year, number of individuals genotyped with microsatellite markers ( $N_{\text{msat}}$ ) and the number of individuals subsampled in the RADseq analyses ( $N_{\text{Rad-Seq}}$ )

| Number | Location                       | Country  | Collector(s)                                             | Date of sampling | $N_{\text{msat}}$ | $N_{\text{Rad-Seq}}$ |
|--------|--------------------------------|----------|----------------------------------------------------------|------------------|-------------------|----------------------|
| 1      | Muroran                        | Japan    | K. Kogame                                                | 2006             | 32                | 16                   |
| 2      | Oshima                         | Japan    | AH. Engelen, J. Boavida, D. Paulo                        | 2007             | 32                |                      |
| 3      | Kashikojima                    | Japan    | AH. Engelen, J. Boavida, D. Paulo                        | 2007             | 32                | 16                   |
| 4      | Inhoshima                      | Japan    | AH. Engelen, J. Boavida, D. Paulo, RO Santos             | 2007             | 29                |                      |
| 5      | Arida                          | Japan    | AH. Engelen, J. Boavida, D. Paulo, RO Santos             | 2007             | 32                | 15                   |
| 6      | Anan                           | Japan    | AH. Engelen, J. Boavida, D. Paulo, RO Santos             | 2007             | 31                | 16                   |
| 7      | Hiroshima                      | Japan    | AH. Engelen, J. Boavida, D. Paulo, RO Santos             | 2007             | 32                | 15                   |
| 8      | Sobol Bay                      | Russia   | A. Skriptsova                                            | 2009             | 11                |                      |
| 9      | Craig                          | USA, AK  | D. Garza                                                 | 2006             | 1                 |                      |
| 10     | San Juan Island                | USA, WA  | K. Britton-Simmons                                       | 2006             | 24                | 16                   |
| 11     | Tatoosh Island                 | USA, WA  | C. Pfister                                               | 2005             | 18                | 14                   |
| 12     | Coos Bay                       | USA, OR  | D. Haydar, J. Carlton                                    | 2005             | 24                | 7                    |
| 13     | San Francisco (Pier 39)        | USA, CA  | S. Le Cam, S. Bouchemousse                               | 2013             |                   | 2                    |
| 14     | San Luis Obispo                | USA, CA  | C. Roe BEll                                              | 2006             | 24                |                      |
| 15     | Crystal Cove                   | USA, CA  | J. Smith, S. Murray                                      | 2005             | 24                | 16                   |
| 16     | Laguna Beach                   | USA, CA  | J. Smith, S. Murray                                      | 2005             | 24                | 16                   |
| 17     | Enseñada (Playa La Esmeralda)  | Mexico   | AH Engelen                                               | 2010             | 23                |                      |
| 18     | Punta Baja                     | Mexico   | L. Aguilar-Rosas, R. Aguilar-Rosas                       | 2006             | 24                | 16                   |
| 19     | Øygarden                       | Norway   | K. Sjøtun, T. Aires                                      | 2006-2014        | 46                | 14                   |
| 20     | Kircubbin                      | UK       | F. Mineur                                                | 2006             | 22                | 16                   |
| 21     | Carnson Point                  | Ireland  | C. Golléty                                               | 2011             | 36                |                      |
| 22     | Lough Hyne                     | Ireland  | C. Golléty                                               | 2011             | 19                | 15                   |
| 23     | Widemouth                      | UK       | N. Mieszkowska                                           | 2011             | 32                |                      |
| 24     | Newquay                        | UK       | N. Mieszkowska                                           | 2011             | 24                |                      |
| 25     | Porthleven                     | UK       | N. Mieszkowska                                           | 2011             | 24                |                      |
| 26     | Looe                           | UK       | N. Mieszkowska                                           | 2011             | 24                |                      |
| 27     | Wembury                        | UK       | N. Mieszkowska                                           | 2011             | 31                | 15                   |
| 28     | Langerstone Point              | UK       | N. Mieszkowska                                           | 2011             | 23                |                      |
| 29     | Brixham                        | UK       | N. Mieszkowska                                           | 2011             | 24                |                      |
| 30     | Torquay                        | UK       | N. Mieszkowska                                           | 2011             | 24                |                      |
| 31     | Lyme Regis                     | UK       | N. Mieszkowska                                           | 2011             | 32                |                      |
| 32     | Osmington Mills                | UK       | N. Mieszkowska                                           | 2011             | 23                |                      |
| 33     | Ostende                        | Belgium  | F. Kerckhof                                              | >2000            | 20                |                      |
| 34     | Audresselles                   | France   | F. Gevaert                                               | 2011             | 32                |                      |
| 35     | Wimereux                       | France   | F. Gevaert                                               | 2011             | 32                | 16                   |
| 36     | Blainville sur Mer             | France   | J.-C. Leclerc                                            | 2011             | 32                |                      |
| 37     | Saint-Malo                     | France   | L. Levêque, F. Viard                                     | 2011             | 32                |                      |
| 38     | Saint-Cast                     | France   | R. Lasbleiz, F. Riquet                                   | 2011             | 32                |                      |
| 39     | Bréhat                         | France   | L. Levêque, F. Viard and colleagues                      | 2009             | 32                |                      |
| 40     | Perros-Guirec                  | France   | L. Levêque, F. Viard                                     | 2011             | 32                |                      |
| 41     | Trébeurden                     | France   | L. Levêque, F. Viard                                     | 2011             | 32                |                      |
| 42     | Carantec                       | France   | C. Daguin-Thiébaud                                       | 2011             | 32                |                      |
| 43     | Roscoff                        | France   | L. Levêque, T. Aires                                     | 2006-2014        | 45                | 14                   |
| 44     | Cléder                         | France   | S. Bouchemousse, L. Noel, F. Viard                       | 2011             | 32                |                      |
| 45     | Aber Wrac'h                    | France   | M. Camusat, Y. Fontana                                   | 2011             | 32                |                      |
| 46     | Plouzané                       | France   | V. Stiger                                                | 2011             | 32                |                      |
| 47     | Camaret                        | France   | L. Levêque, W. Thomas                                    | 2011             | 32                |                      |
| 48     | Concarneau                     | France   | S. Bouchemousse, C. Daguin-Thiébaud                      | 2011             | 32                |                      |
| 49     | Ploemeur                       | France   | V. Stiger                                                | 2011             | 32                |                      |
| 50     | Quiberon                       | France   | L. Levêque and colleagues                                | 2011             | 32                |                      |
| 51     | Thau (Sète)                    | France   | N. Bierne                                                | 2011             | 32                | 16                   |
| 52     | La Coruña                      | Spain    | L. Couceiro, A. Geoffroy, S. Krueger-Hadfield, S. Mauger | 2011             | 31                |                      |
| 53     | Viana de Castelo (Montedor)    | Portugal | L. Couceiro, A. Geoffroy, S. Krueger-Hadfield, S. Mauger | 2011             | 32                |                      |
| 54     | Porto (Leça de Palmeira North) | Portugal | L. Couceiro, A. Geoffroy, S. Krueger-Hadfield, S. Mauger | 2011             | 31                | 16                   |
| 55     | Sidi Bouzid                    | Morocco  | T. Aires                                                 | 2014             | 24                | 16                   |

**Table S2. Characteristics of the microsatellite markers developed for *Sargassum muticum*.**

Locus code, multiplex code, forward and reverse primers, repeat array, allele size and number of alleles (Nall) over all the studied individuals (N=1500). Accession numbers for the microsatellite sequences: JQ860127-JQ860140.

| Locus | multiplex | Forward primer (5'-3')    | Reverse primer (5'-3')    | repeat array                                                             | allele size   | Nall |
|-------|-----------|---------------------------|---------------------------|--------------------------------------------------------------------------|---------------|------|
| SmC08 | A         | ACCAACAAGCTTCAGCCTTC      | CGTACAGGGTAACGGTCAGG      | (GT) <sub>3</sub> T(TG) <sub>7</sub> T <sub>4</sub> (GATTT) <sub>2</sub> | 125, 137      | 2    |
| SmC24 | A         | ACTTGCTGTGGTACTTAACGC     | TTCTAGTAACGATACGACAACCG   | (TAG) <sub>3</sub> (TGG) <sub>5</sub> (TG) <sub>2</sub>                  | 96, 99, 102   | 3    |
| SmD05 | A         | ATGTGGATTATTATAAGGTTGGGG  | AACGGAGTACGGTAGTGTCTGA    | (AC) <sub>10</sub>                                                       | 187, 189, 191 | 3    |
| SmD10 | B         | CGACACTATCGTGCAACAGC      | CCGAAGAAGGCCGAAATACT      | (CA) <sub>9</sub>                                                        | 210, 212      | 2    |
| SmD33 | B         | ATGATTTTGCCTTTTGCAGG      | GGAGTTCATCGCGGATAGAT      | (CT) <sub>7</sub>                                                        | 289, 291      | 2    |
| SmD34 | A         | ATCAATCATCGCACACTAAGTCA   | TGTTTTCTCTATGGCTCATTGTCT  | (CA) <sub>8</sub>                                                        | 187, 189      | 2    |
| SmD41 | A         | TTCCATTTTCCTTGTTTCAGC     | TGTTGCTGTAGGGATGTGTCA     | (CA) <sub>7</sub>                                                        | 144, 149      | 2    |
| SmQ02 | B         | GCAATCAATCGCTGGTGATA      | TTGTCTGGGCTATCCTCTCC      | (ATTG) <sub>7</sub>                                                      | 78, 87        | 2    |
| SmQ03 | A         | ATAGACTCACTCGCTCGTCG      | ACCACCCACCCTAATACGAA      | (ATAG) <sub>6</sub>                                                      | 132, 139      | 2    |
| SmQ04 | B         | CTGAGATAGATACGGAATGACAACA | ACCACGGGCTGGGTCTTT        | (TTGA) <sub>6</sub>                                                      | 118, 130, 138 | 3    |
| SmT13 | B         | GAACGGTCATTAGCCGTAGC      | TTGTAATATTGTAGCCCTTAGTGAA | (ACC) <sub>8</sub>                                                       | 136, 139      | 2    |
| SmT15 | B         | GGTGTCTAGAGGGATGATGTAGG   | CGCCTACCAGGGTTAAGCTA      | (TGT) <sub>8</sub>                                                       | 103, 106      | 2    |
| SmT29 | B*        | CACGGGCTGAATCTTTGAG       | CCTGTAAGGGCCGATGTTAC      | (CAA) <sub>6</sub>                                                       | 174, 175      | 2    |
| SmT30 | B         | CAGTTTGACGCATCACTGCT      | GCCTAGGAACGAAGGTGGAC      | (ACC) <sub>6</sub>                                                       | 173, 176      | 2    |

\*: locus T29 was amplified separately and co-electrophoresed with the other loci from multiplex B.

**Table S3. Genetic diversity and selfing rates, computed for the microsatellite panel, in *Sargassum muticum* populations.**

N: number of individuals;  $n_{\text{all}}$ : mean number of alleles per locus;  $H_e$ : gene diversity;  $N_{\text{MLG}}$  number of multilocus genotypes;  $\text{MLG}_{\text{priv}}$ : number of private multilocus genotypes; D: genotypic diversity. Selfing rate estimates (i)  $s_{g2}$  (test  $S_{g2}=0$  by 1000 iterations), (ii)  $s_{\text{ML}}$ : maximum likelihood estimate (95% confidence interval)

| no.        | Locality      | Sampling size | Allelic diversity |       | Genotypic diversity |                            |       | Selfing rate estimate       |                         |
|------------|---------------|---------------|-------------------|-------|---------------------|----------------------------|-------|-----------------------------|-------------------------|
|            |               | N             | $n_{\text{all}}$  | $H_e$ | $N_{\text{MLG}}$    | $\text{MLG}_{\text{priv}}$ | D     | $s_{g2}$ ( <i>P-value</i> ) | $s_{\text{ML}}$ (CI 95) |
| Population |               |               |                   |       |                     |                            |       |                             |                         |
| 1          | Muroran       | 32            | 1.14              | 0.005 | 2                   | 2                          | 0.637 | 0.999 ( $<10^{-3}$ )        | 0.988 (0.941-0.999)     |
| 2          | Oshima        | 32            | 1.43              | 0.096 | 14                  | 14                         | 0.063 | 0.785 (0.072)               | 0.799 (0.000-0.941)     |
| 3          | Kashikojima   | 32            | 1.43              | 0.062 | 8                   | 8                          | 0.710 | 0.000 (0.112)               | 0.000 (0.000-0.959)     |
| 4          | Inhoshima     | 29            | 1.43              | 0.120 | 15                  | 13                         | 0.781 | 0.194 (0.267)               | 0.187 (0.000-0.823)     |
| 5          | Arida         | 32            | 1.07              | 0.009 | 2                   | 1                          | 0.760 | --                          | --                      |
| 6          | Anan          | 31            | 1.64              | 0.325 | 5                   | 4                          | 0.904 | 0.999 ( $<10^{-3}$ )        | 0.992 (0.988-0.999)     |
| 7          | Hiroshima     | 32            | 1.36              | 0.103 | 10                  | 8                          | 0.121 | 0.908 (0.001)               | 0.903 (0.778-0.955)     |
| 8          | Sobol Bay     | 11            | 1.57              | 0.137 | 8                   | 8                          | 0.843 | 0.764 (0.045)               | 0.745 (0.000-0.908)     |
| Region     |               |               |                   |       |                     |                            |       |                             |                         |
| 1-8        | Asia (native) | 231           | 2.21              | 0.364 | 60                  | 59                         | 0.921 | NA                          | NA                      |
| 9-17       | NE Pacific    | 186           | 1                 | 0     | 1                   | 0                          | 0     | NA                          | NA                      |
| 18-54      | NE Atlantic   | 1083          | 1                 | 0     | 1                   | 0                          | 0     | NA                          | NA                      |

**Table S4. Theta-estimates of  $F_{st}$ , following Weir & Cockerham (1984), obtained with microsatellite loci, between pairs of Asian populations of *Sargassum muticum*.**

All theta values are significantly different from zero (permutation test; 2000 perm.; Genetix software). The null hypothesis of similar distribution of allelic frequencies between populations was also tested with an exact test implemented in Genepop v4.0: the null hypothesis was rejected for all pairwise comparison ( $P < 10^{-5}$ ).

| Theta       | Oshima | Kashikojima | Inhoshima | Arida | Anan  | Hiroshima | Sobol Bay |
|-------------|--------|-------------|-----------|-------|-------|-----------|-----------|
| Muroran     | 0.858  | 0.961       | 0.878     | 0.987 | 0.767 | 0.863     | 0.879     |
| Oshima      |        | 0.844       | 0.533     | 0.791 | 0.524 | 0.592     | 0.710     |
| Kashikojima |        |             | 0.820     | 0.929 | 0.500 | 0.856     | 0.863     |
| Inhoshima   |        |             |           | 0.358 | 0.369 | 0.196     | 0.638     |
| Arida       |        |             |           |       | 0.452 | 0.485     | 0.847     |
| Anan        |        |             |           |       |       | 0.472     | 0.521     |
| Hiroshima   |        |             |           |       |       |           | 0.583     |

**Table S5. *Sargassum muticum* genetic diversity and estimated selfing rates obtained with Rad seq loci in introduced and native populations.**

$N_{indiv}$ ,  $N_{loc}$ ,  $N_{ind\ high}$ ,  $H_s$  and  $s_{g2}$  stand for the number of individuals studied, the number of polymorphic loci, the number of individuals used for the population analyses (i.e., high quality Rad-sequencing, with less than 10% missing data), the gene diversity and selfing rate estimates (maximum likelihood estimate with 95% confidence interval). Population number (no) refer to numbers in Fig. 1 in the main manuscript.

| Pop Name                                  | no. | $N_{ind}$ | $N_{loc}$ | $N_{ind\_High}$ | $H_s$ | $s_{g2}$ (CI 95)    |
|-------------------------------------------|-----|-----------|-----------|-----------------|-------|---------------------|
| <b>Native range</b>                       |     |           |           |                 |       |                     |
| Muroran                                   | 1   | 16        | 2035      | 12              | 0.091 | 0.595 (0.307-0.693) |
| Kashikojima                               | 3   | 16        | 3843      | 16              | 0.120 | 0.767 (0.543-0.823) |
| Arida                                     | 5   | 15        | 3626      | 5               | 0.172 | 0.993 (NaN-0.995)   |
| Anan                                      | 6   | 16        | 4354      | 13              | 0.242 | 0.976 (0.430-0.983) |
| Hiroshima                                 | 7   | 15        | 4626      | 14              | 0.182 | 0.495 (0.161-0.617) |
| <b>Introduced range</b>                   |     |           |           |                 |       |                     |
| <b>North East Pacific – northern part</b> |     |           |           |                 |       |                     |
| San Juan Isl.                             | 10  | 16        | 1315      | 16              | 0.043 | 0.730 (0.558-0.811) |
| Tatoosh                                   | 11  | 14        | 454       | 9               | 0.017 | 0.000 (0.000-0.034) |
| Coos Bay                                  | 12  | 7         | 574       | 4               | 0.040 | 0.793 (0.000-0.914) |
| San Fransisco                             | 13  | 2         | 273       | 1               | 0.000 | NA                  |
| <b>North East Pacific – southern part</b> |     |           |           |                 |       |                     |
| Crystal Cove                              | 15  | 16        | 37        | 16              | 0.001 | 0.315 (0.000-0.472) |
| Punta Baja                                | 18  | 16        | 31        | 16              | 0.001 | 0.000 (NaN-0.335)   |
| Laguna Beach                              | 16  | 16        | 30        | 16              | 0.001 | 0.266 (0.000-0.471) |
| <b>North East Atlantic – Group 1</b>      |     |           |           |                 |       |                     |
| Øygarden                                  | 19  | 14        | 46        | 8               | 0.001 | 0.535 (0.153-0.729) |
| Kircubbin                                 | 20  | 15        | 47        | 9               | 0.001 | 0.000 (0.000-0.185) |
| Lough Hyne                                | 22  | 14        | 32        | 11              | 0.001 | 0.245 (0.000-0.450) |
| Wimereux                                  | 35  | 16        | 22        | 16              | 0.001 | 0.000 (0.000-0.236) |
| Wembury                                   | 27  | 15        | 22        | 15              | 0.001 | 0.261 (0.000-0.436) |
| Roscoff                                   | 43  | 14        | 45        | 12              | 0.001 | 0.693 (0.000-0.780) |
| Sidi Bouzid                               | 55  | 16        | 15        | 16              | 0.001 | 0.000 (0.000-0.000) |
| <b>North East Atlantic – Group 2</b>      |     |           |           |                 |       |                     |
| Porto                                     | 54  | 15        | 867       | 15              | 0.046 | 0.857 (0.538-0.918) |
| Thau                                      | 51  | 16        | 848       | 16              | 0.021 | 0.812 (0.171-0.852) |

**Fig. S1. Venn diagram showing the number of polymorphic Rad-Seq loci shared among different geographic entities in the native and introduced ranges of *Sargassum muticum*.**

NEP and NEA stand for the two introduction ranges, namely North East Pacific and North East Atlantic, respectively.

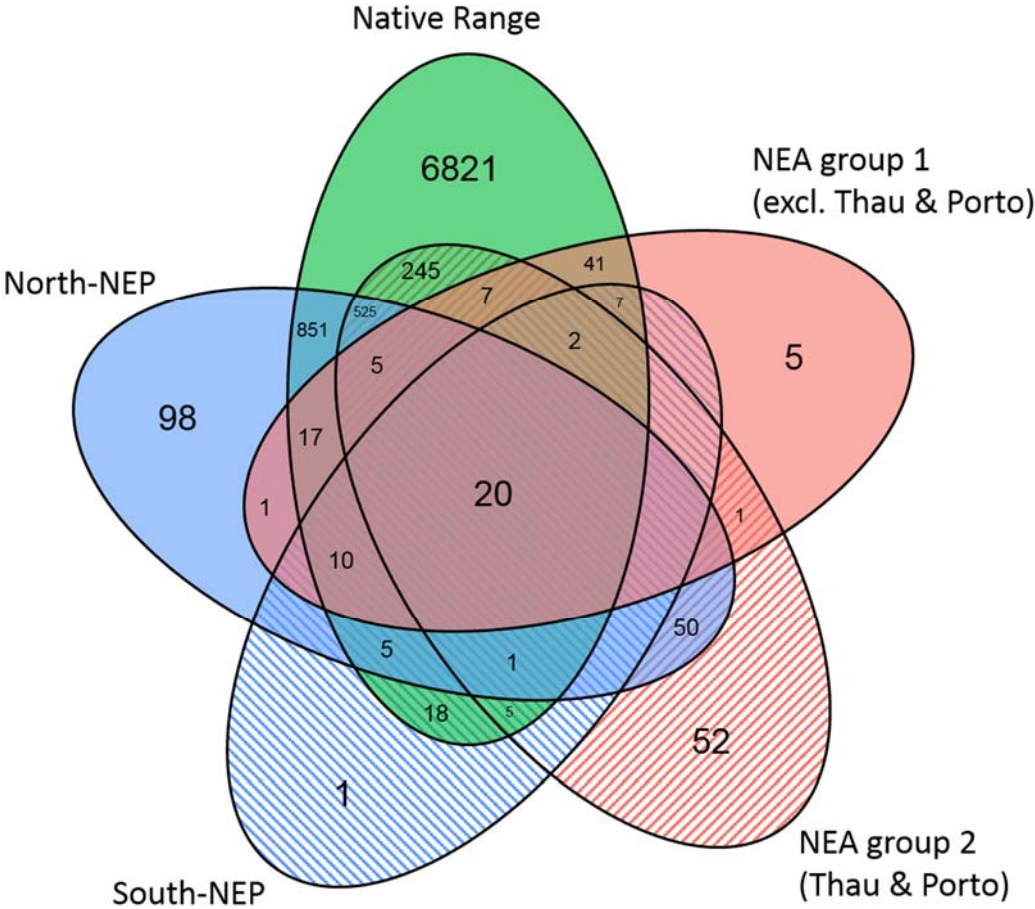

Figure S2. Bayesian clustering results and individual memberships, obtained with InStruct analyses carried out separately (A) for the native range (K=5) and (B) the introduced range (K=3)

(A) Native range

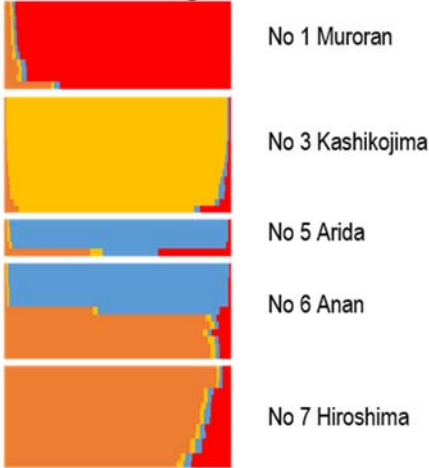

(B) Introduced range

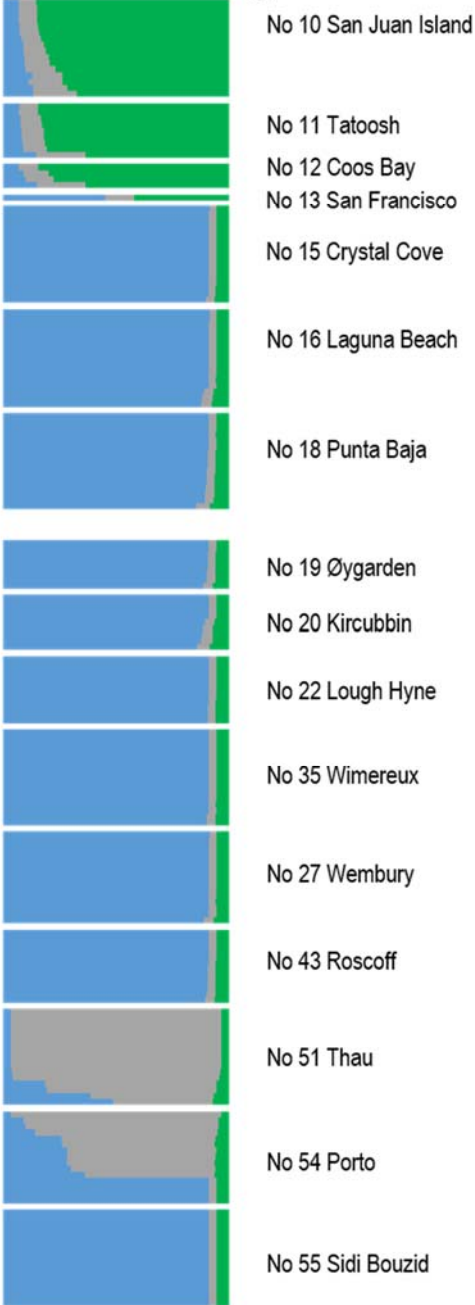

**Fig S3. Heatmap of *Sargassum muticum* population pairwise  $F_{st}$  estimates (Theta estimate of Weir & Cockerham (1984)) reordered according to the  $F_{st}$ -based dendrogram. Color key is indicated in legend together with the distribution of the value (density). The geographic area of the populations is color-coded below the dendrogram (Green: Native range, Blue: introduced range in North East Pacific and Pink: introduced range in North East Atlantic)**

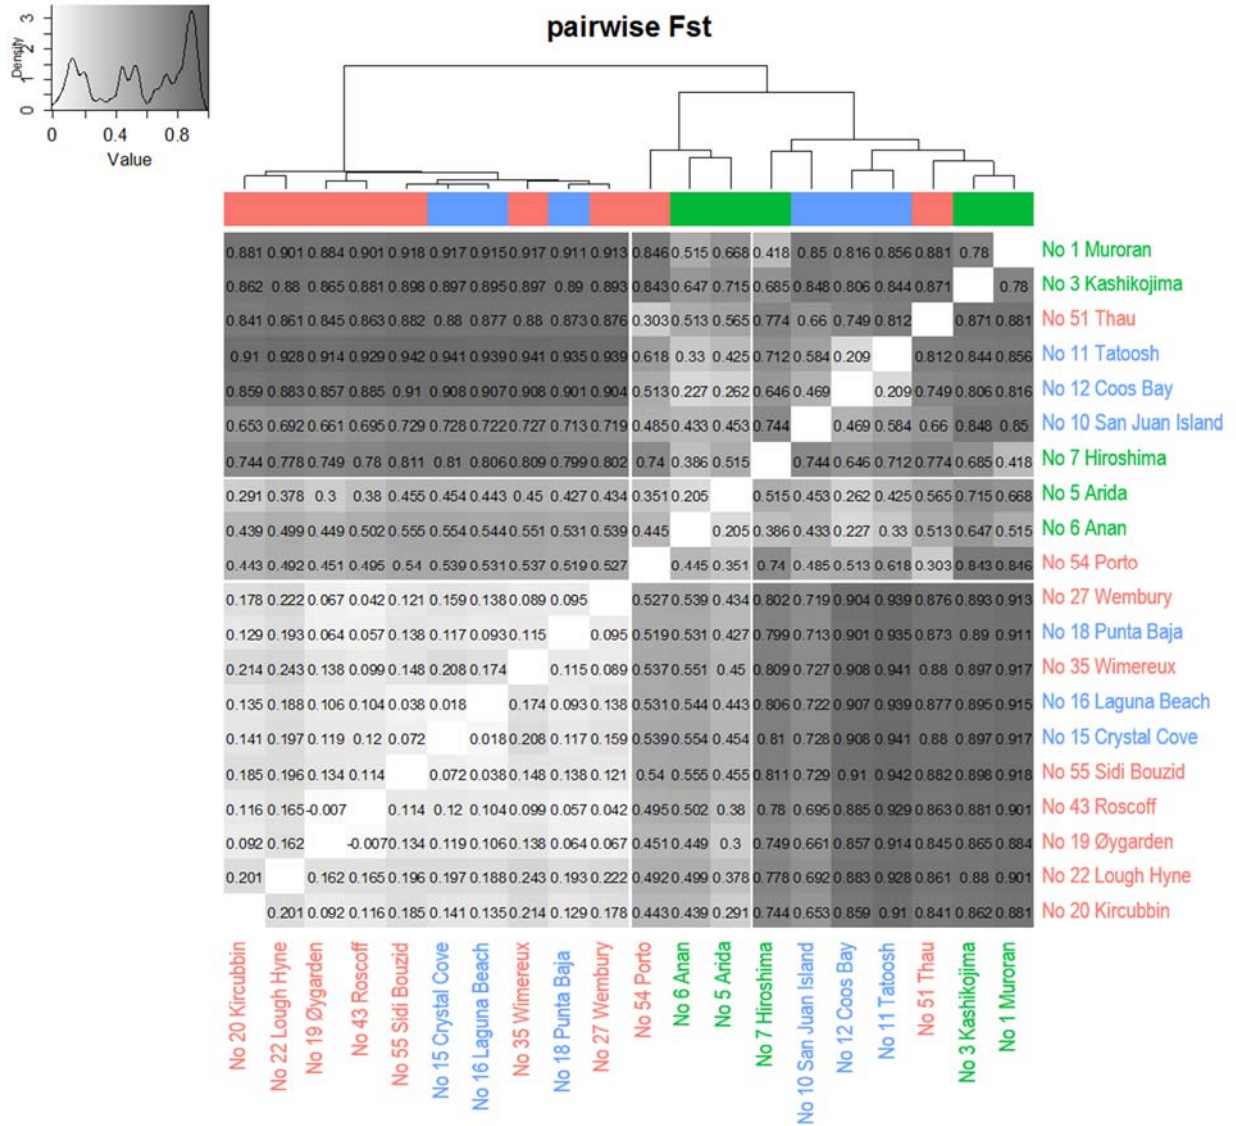

Supplement: EVA-13-500-s001.pdf [file EVA-13-500-s001.pdf]
